# Supplementary material for: Streptococcus australis and Ralstonia pickettii as Major Microbiota in Mesotheliomas
Source: PubMed Central journal article supplement (PMC8070724; doi:10.3390/jpm11040297), 2021-04-14
Supplement: jpm-11-00297-s001.pdf [file jpm-11-00297-s001.pdf]

## Supplementary Figure S1.

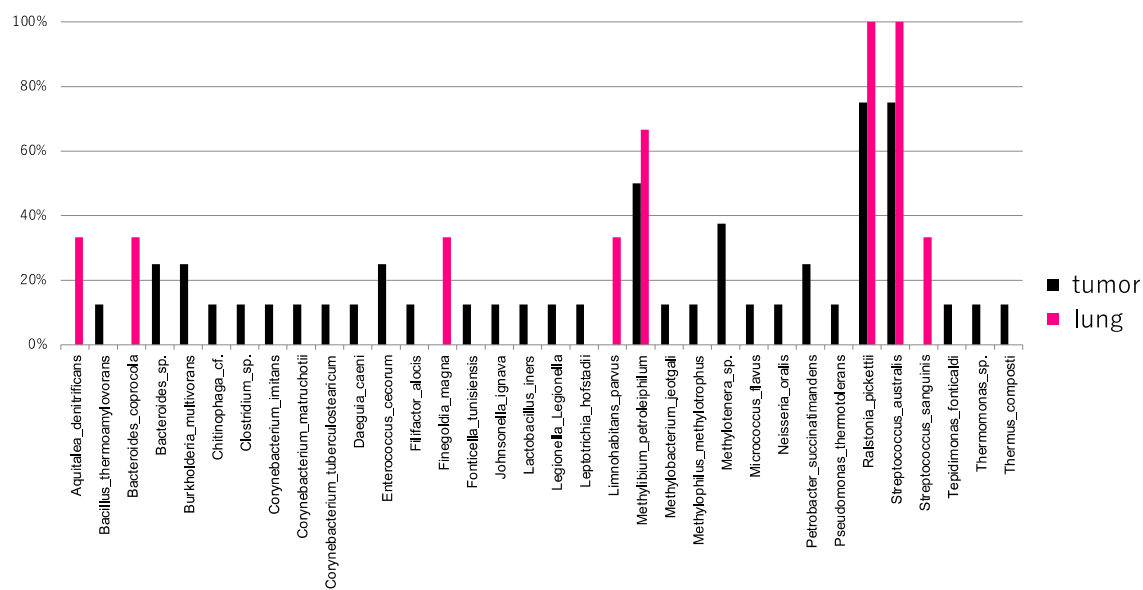

Composition of detected species in all samples. Composition of *Streptococcus australis* and *Ralstonia pickettii* was higher both in tumor (as shown in black bar) and lung (as shown in red bar) samples.
